# Supplementary material
Source: PubMed Central journal article supplement (PMC6004790)

# Supplemental Figure. 1

**A** RB/E2F  
 tgatag**TCGCCAAA**gtttaat (CyclinA Promoter)

RB/E2F  
 cac**CGCGGGA**atcc (PCNA Promoter)

**B**

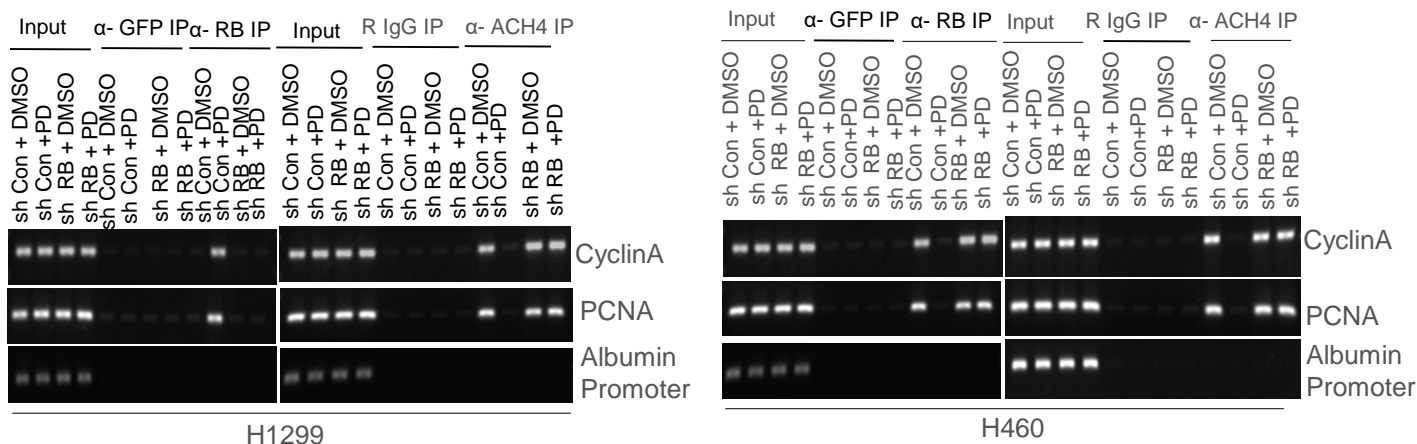

**C**

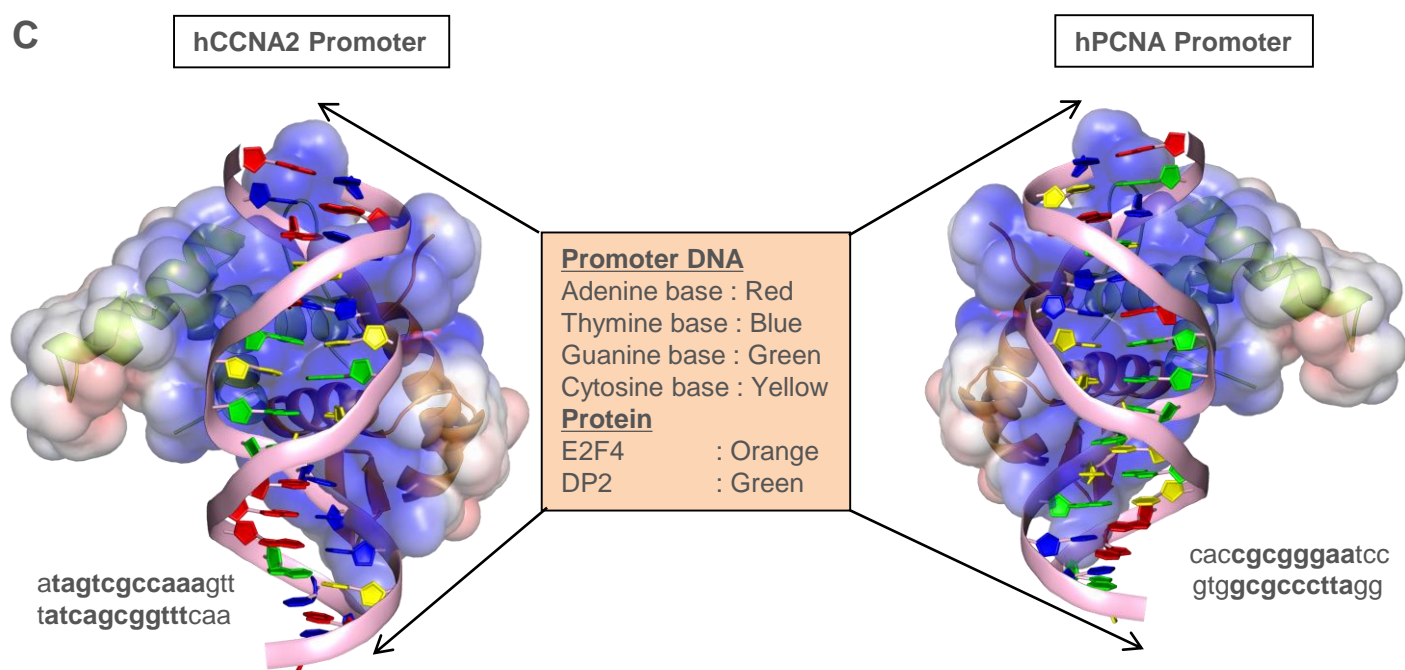

**D**

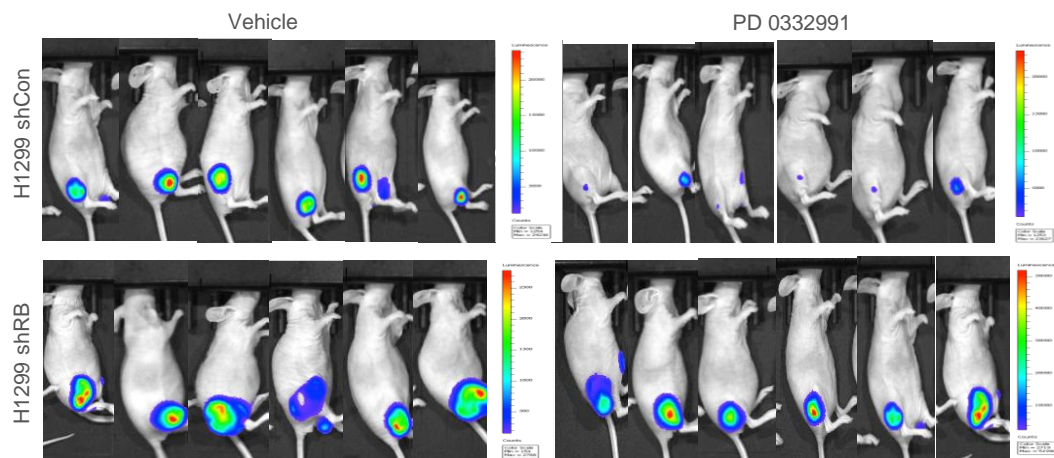

# Supplemental Figure. 2

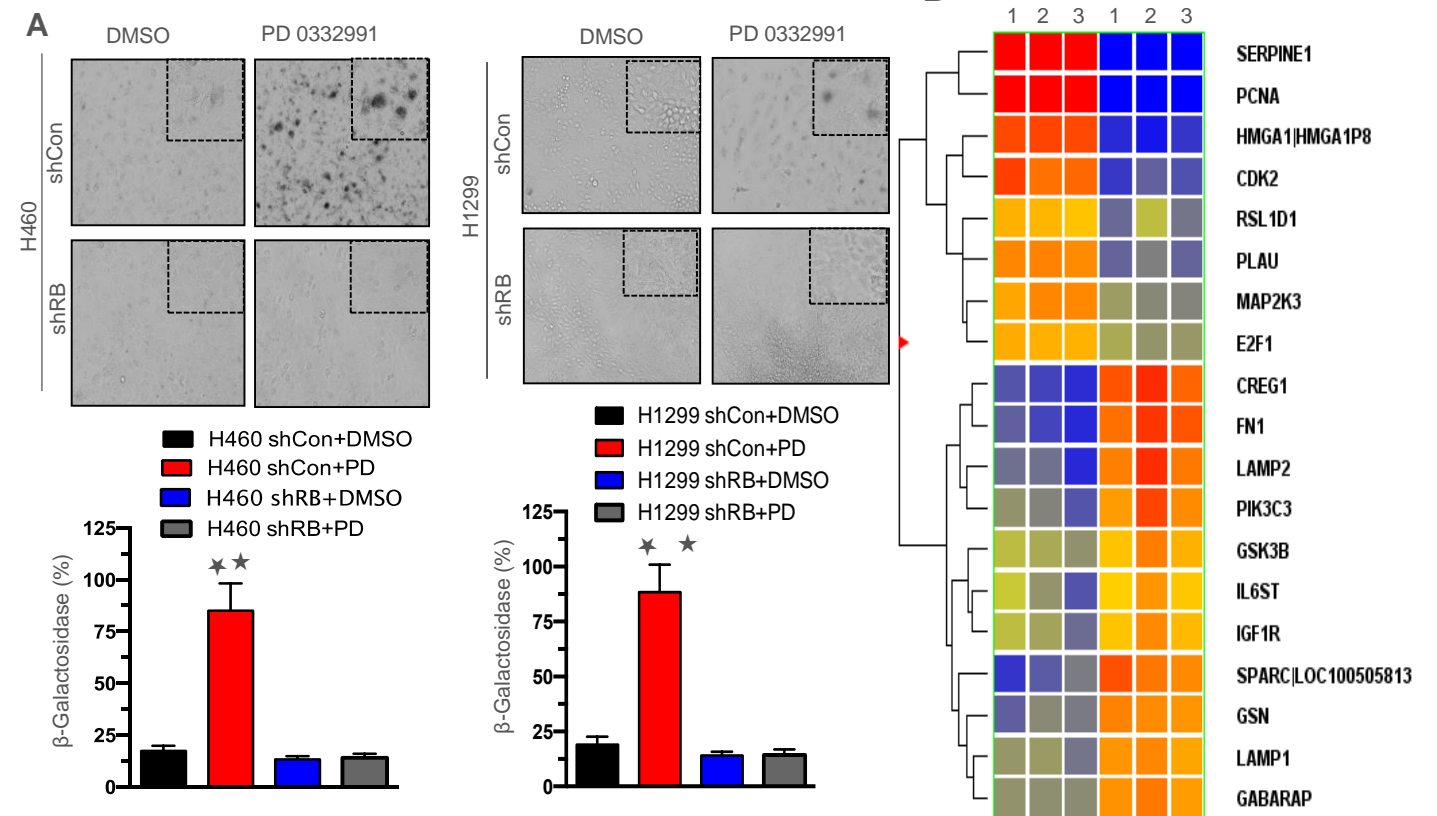

# Supplemental Figure 3

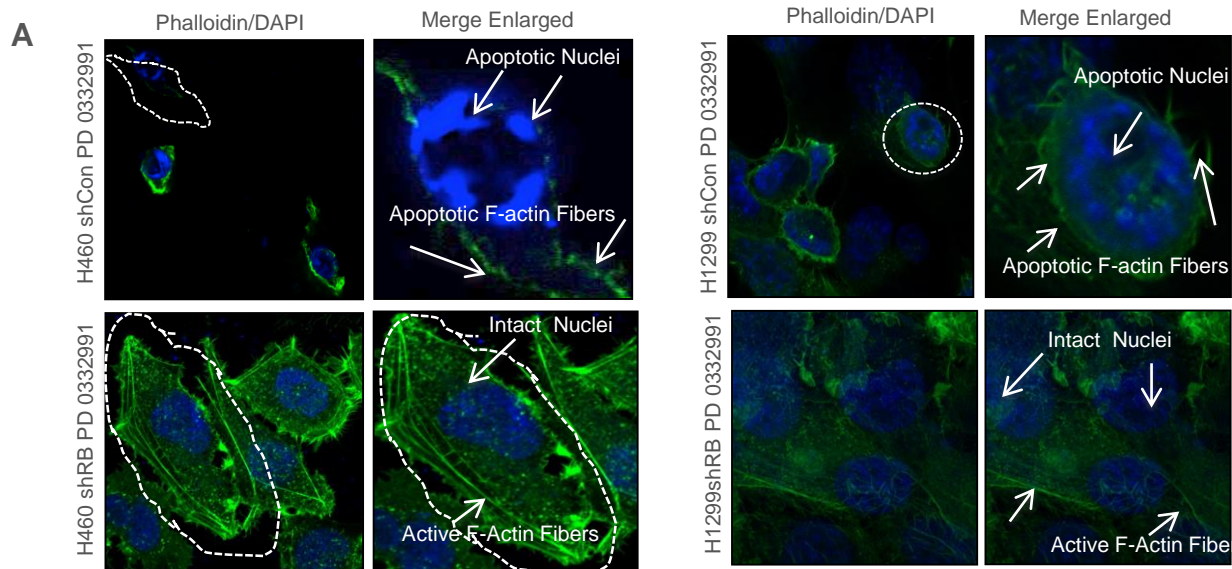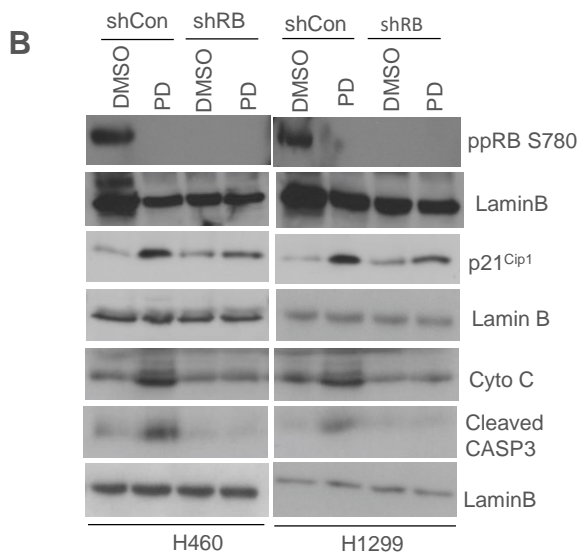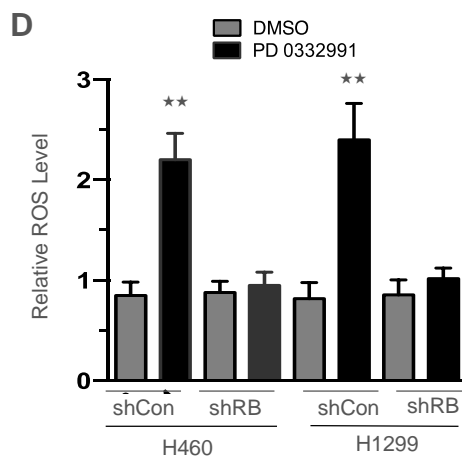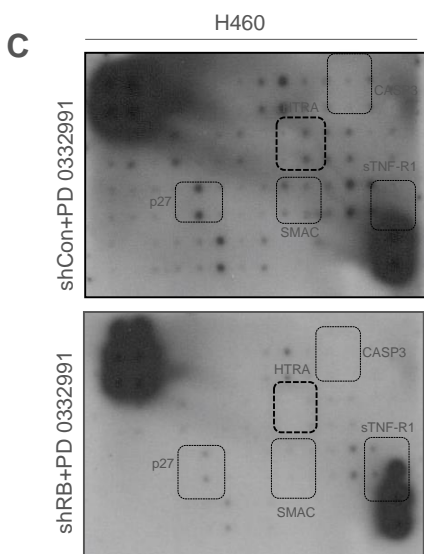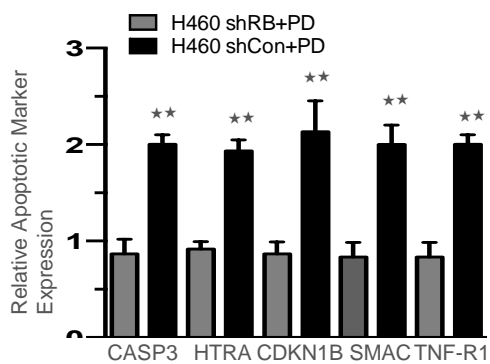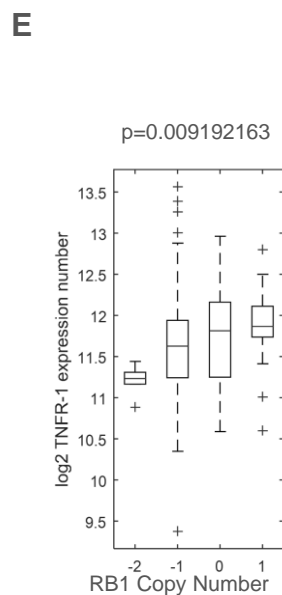

# Supplemental Figure . 4

**A**

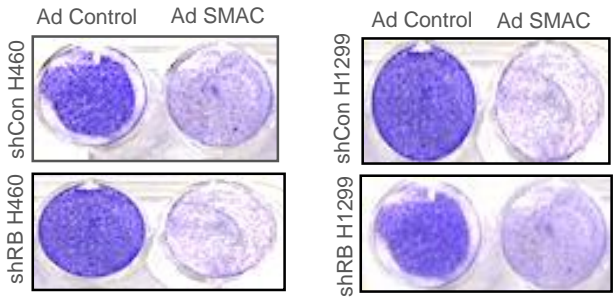

**B**

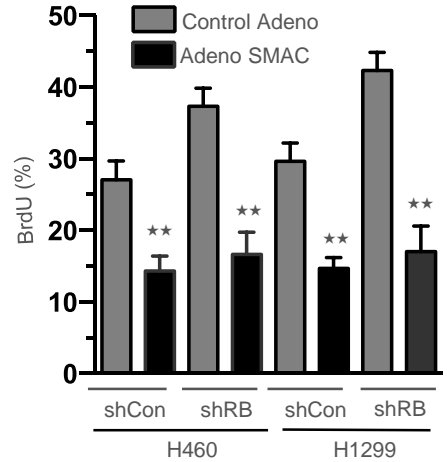

**C**

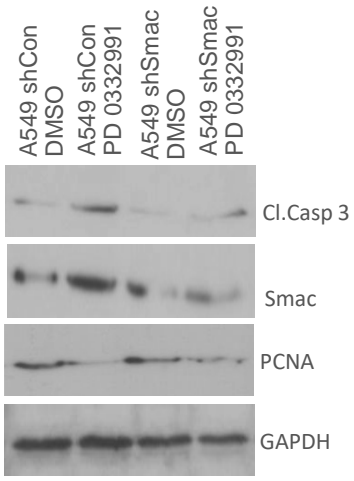

**D**

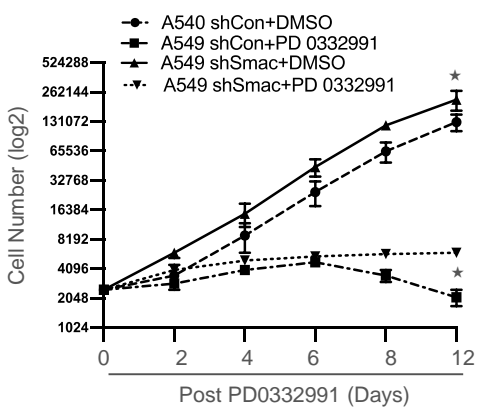

# Supplemental Figure. 5

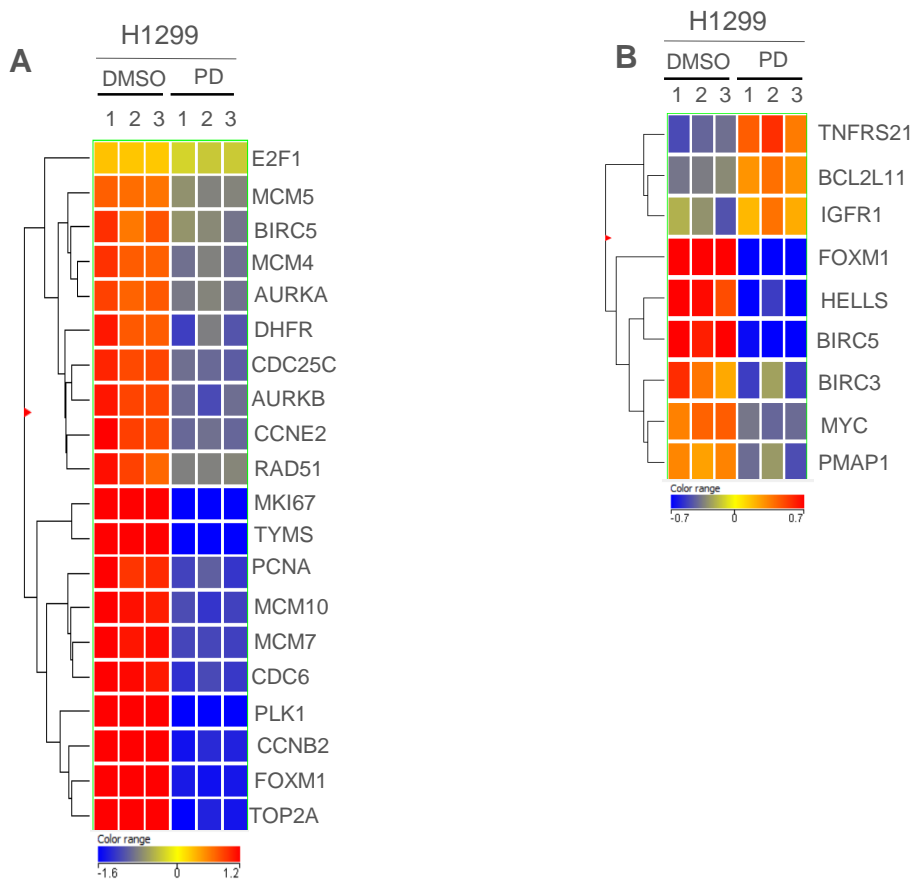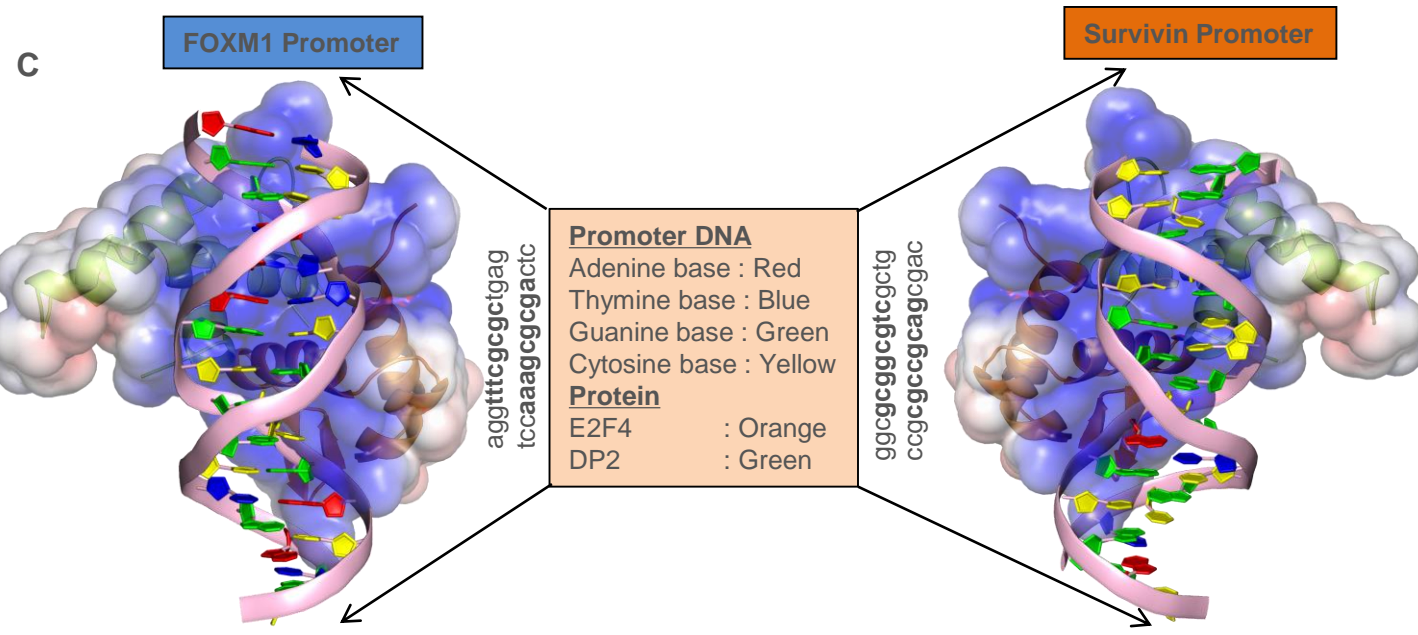

Supplemental Figure. 6

Working Model (RB/FOXM1/Survivin/SMAC/Caspase 3 Signaling → Apoptosis)

CYTOPLASM

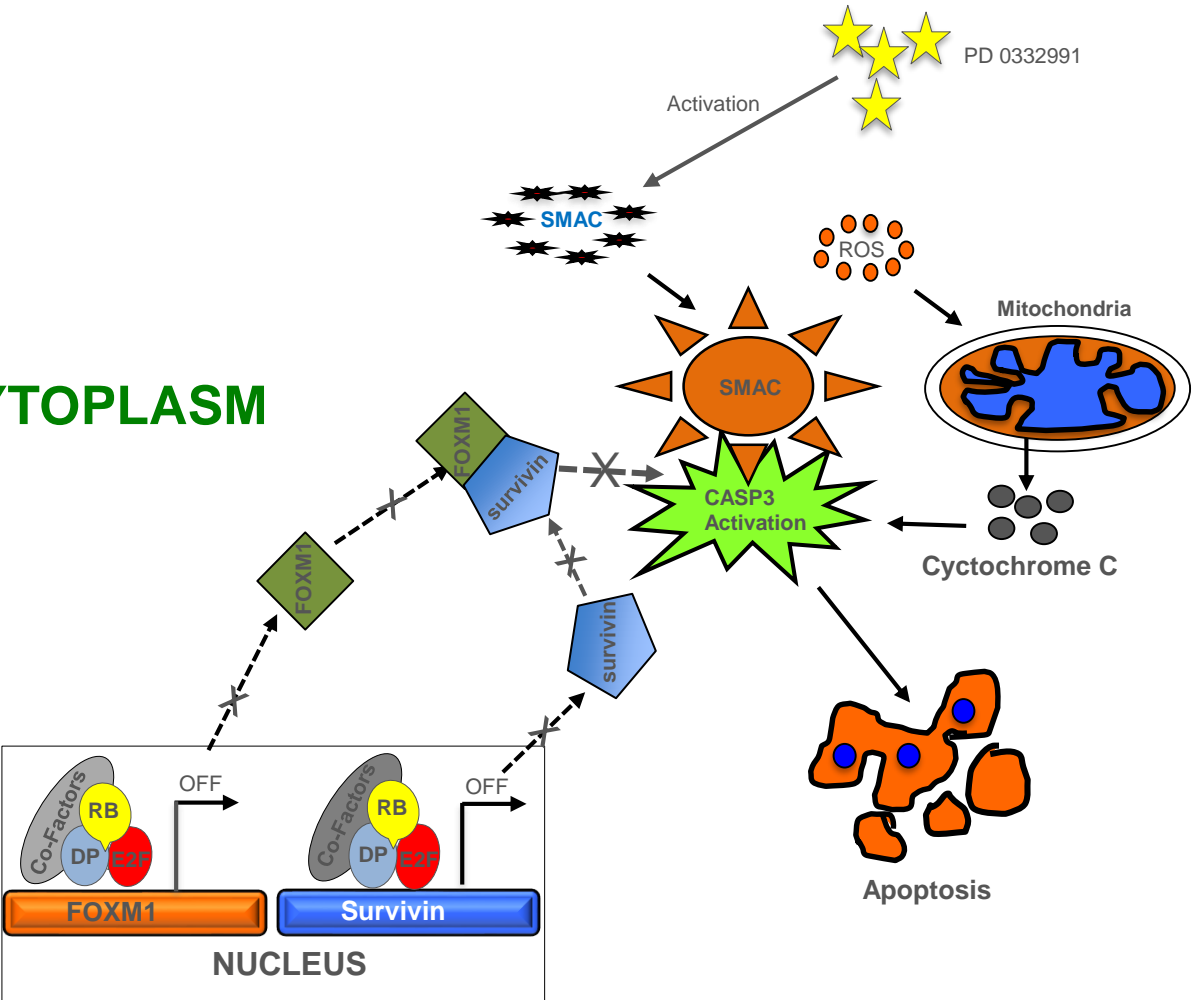

Supplement: NIHMS974087-supplement-4.pdf [file NIHMS974087-supplement-4.pdf]
